# Supplementary material for: System-wide assessment of plastic pollution in Indonesia: External stakeholder mapping
Source: Research Square preprint supplement (doi:10.21203/rs.3.rs-6264128/v1), 2025-03-31
Supplement: Supplementary file 1 [file 2fb5ac3a2228f3f9b85d3cd9.docx]

**SUPPORTING INFORMATION**

Spyridoula Gerassimidoua, Mike Websterb, Andre Kuncoroyektib, David Wilsonc, Susan Joblinga, Eddy Soedjonod, Elena Lovate, Eleni Iacovidoua, *

a Division of Environmental Sciences, College of Health, Medicine and Life Sciences, Brunel University London, Uxbridge, UB8 3PH, United Kingdom

b Systemiq, Gran Rubina Business Park, Jl. H.R. Rasuna Said, Jakarta 12940

cDepartment of Civil and Environmental Engineering, Imperial College London, London, UK

dLaboratory of Water Technology, Department of Environmental Engineering, Institut Teknologi Sepuluh Nopember, Indonesia

e Global Green Growth Institute, Jeongdong Building, 21-15 Jeongdong-gil, Jung-gu, Seoul, 04518, Republic of Korea

*Corresponding author: Eleni Iacovidou, [eleni.iacovidou@brunel.ac.uk](mailto:eleni.iacovidou@brunel.ac.uk)

1. **Complex Value Optimization for Resource Recovery Plus (CVORR) (Iacovidou et al., 2020)**

**Fig. A1** depicts the entire CVORR approach. In the baseline analysis, there are 5 steps involved. The process of defining the scope and goals of the analysis (Step 1), and system boundaries (Step 2), the identification and mapping of the processes and flows (Step 3), and structures (actors, or stakeholders) (Step 4) and the conceptualisation of multidimensional value involved in the system (Step 5). The latter is achieved by representing value across five ‘sub-systems’, the behaviour of which affects the entire resource recovery system. Hence, evaluating the role and dynamics of these subsystems in the value chain can provide a means to understand how a system functions as a whole. None of these (sub-systems) on its own has an independent effect on the resource recovery system, as they are inherently interconnected.


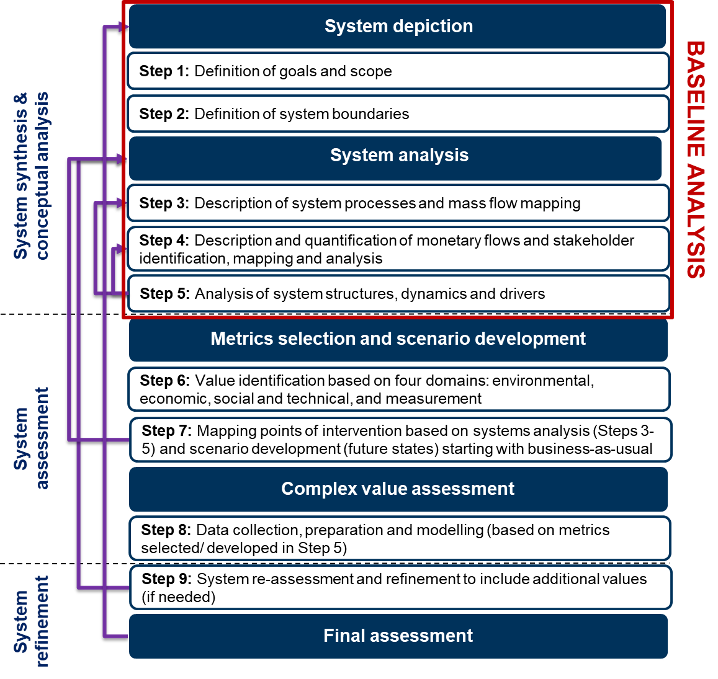


**Fig. A1 The CVORR Approach. Adopted from: (Iacovidou et al., 2020)**

As shown in **Fig. A1**, following the baseline CVORR approach, first we set the scope of the systems-based analysis and boundaries (Steps 1 and 2) to understand the extent and potential of reducing plastic pollution in Indonesia, looking at a high-level, national scale. Mass flow mapping (Step 3) is a key step of a systems-based analysis as it delineates the system boundaries and the key processes that are directly and indirectly associated with the mass flows. A tool, widely used to map MCPs flows is material flow analysis (MFA). It can highlight system inefficiencies and points where optimisation might be needed. However, data is often insufficient in constructing a fully quantitative MFA. In such cases, the qualitative MFA construction is an essential prerequisite as it creates an understanding of the processes involved in a value chain that makes MCPs flow in a particular way.

The mass flow depiction leads seamlessly to the identification of stakeholders (Step 4) that are directly involved in orchestrating the movement of MCPs flows in the value chain. One way of gaining insight into stakeholder identification and mapping is via the description, quantification and mapping of monetary flows. Quantifying monetary flows generates useful insights into the dynamic relationship between stakeholders (as driven by financial flows, ownership, trading, infrastructure, investments, costs, and profits), as it highlights stakeholder transactions. The way data and information are exchanged is key to understanding the resulting prices and value in the market (i.e. why materials and products flow), and the way these are coordinated and managed, which in turn provide insights into the system structures, dynamics and drivers (Step 5). However, monetary data are often unavailable making it difficult to obtain insights into monetary flows and the way these affect the stakeholder dynamics/interactions (Iacovidou et al., 2020). In this regard, finding alternative ways to gain insights into stakeholders’ dynamics/interactions is critical. The present study places specific emphasis on the refinement of Step 4 within the CVORR approach (shown in **Fig. A1)**, which plays a crucial role in understanding the preceding stages of CVORR. In the sections below, the approach used to aid stakeholder identification, mapping and analysis is described.

1. **List of external stakeholders involve or potentially be involved in the plastics value chain in Banyuwangi Regency.**

**Table B1 List of external stakeholder involved in the plastics value chain in Banyuwangi Regency**

| No | Stakeholder | Translation | Type of organisation | Spatial | Activities | Value chain stage of involvement | Website |
| --- | --- | --- | --- | --- | --- | --- | --- |
| 1 | Gubernur | Head in a province | LG | Province | Leadership | P-C-M |  |
| 2 | Bupati | Head of a regency or district | LG | Regency/district | Leadership | P-C-M |  |
| 3 | Mayor | Head of a city | LG | City | Leadership | P-C-M |  |
| 4 | Sekda (Sekretaris Daerah) | Regional Secretary | LG | Province/regency/city | Leadership | P-C-M |  |
| 5 | DPRD (Dewan Perwakilan Rakyat Daerah) | Regional People's Representative Council | LG | Province/regency/city | Decision-making, Leadership | P-C-M | https://dprd.jabarprov.go.id/profil/kedudukan-tugas-pokok-serta-hak-kewajiban#:~:text=DPRD%20merupakan%20Lembaga%20Perwakilan%20Rakyat,Membentuk%20Perda%20bersama%20Gubernur |
| 6 | DPMD (Dinas Pemberdayaan Masyarakat Desa) | Village Community Empowerment Agency | LG | Regency | Decision-making, Leadership, Community well-being, Regional development | P-C-M | https://spm.banyuwangikab.go.id/skpd/dinas-pemberdayaan-masyarakat-dan-desa |
| 7 | Bappeda (Badan Perencanaan Pembangunan Daerah) | Regional Development Planning Agency | LG | Province/regency/city | Decision-making, Leadership, Regional development | P-C-M | https://bappeda.banyuwangikab.go.id/beranda/ |
| 8 | DLH (Dinas Lingkungan Hidup) | Environmental Agency or Environmental Office | LG | Province/regency/city | Decision-making, Leadership, Environmental conservation, Waste management, Pollution control and reduction | P-C-M | https://dlh.batangkab.go.id/?p=1&id=2 |
| 9 | Dinkes (Dinas Kesehatan) | Health Department | LG | Province/regency/city | Decision-making, Leadership, Other public services | P-C-M | https://dinkes.banyuwangikab.go.id/portal/ |
| 10 | Dinas PU CKPP Kabupaten Banyuwangi | Department of Public Works: a specific government agency or department at the regency level (kabupaten) in Banyuwangi | LG | Regency | Decision-making, Leadership, Regional development, Infrastructure development, Other public services | P-C-M | https://spm.banyuwangikab.go.id/skpd/dinas-pekerjaan-umum-cipta-karya-perumahan-dan-permukiman |
| 11 | BPKAD (Badan Pengelolaan Keuangan dan Aset Daerah) | Regional Financial and Asset Management Agency | LG | Province/regency/city | Decision-making, Leadership, Financial management | P-C-M | https://bpkad.jogjakota.go.id/ |
| 12 | BKPP (Badan Kepegawaian Pendidikan dan Pelatihan) | Agency for Education and Training Personnel | LG | Province/regency | Decision-making, Leadership, Other public services | P-C-M | https://bkpp.kendalkab.go.id/ |
| 13 | PU Air (Pengelolaan Sumber Daya Air) / PU Pengairan | Water Resources Agency | LG | Province/regency/city | Decision-making, Leadership, Water resources management | P-C-M | https://pengairan.banyuwangikab.go.id/index.php/visi-misi/visi-misi |
| 14 | Dinas Pendidikan | Education Office | LG | Province/regency/city | Decision-making, Leadership, Other public services | P-C-M |  |
| 15 | Dinas Pariwisata dan Kebudayaan (Dinas Parbud) | Department of Tourism and Culture | LG | Province/regency/city | Decision-making, Leadership, Tourism development, Community well-being | P-C-M | https://banyuwangitourism.com/ |
| 16 | Diskominfo (Dinas Komunikasi dan Informatika) | Office of Communication and Informatics | LG | Province/regency/city | Decision-making, Leadership, Communication | P-C-M | https://diskominfo.banyuwangikab.go.id/index.php/site/page?view=kontak |
| 17 | Kantor Kemenag (Kementerian Agama - KEMENAG) | Regional or local offices of Ministry of Religious Affairs | LG | Province/regency/city | Decision-making, Leadership, Religious affairs | P-C-M | https://banyuwangi.kemenag.go.id/ |
| 18 | PKK (Pemberdayaan Kesejahteraan Keluarga) | Family Welfare Empowerment program | NG | National | Decision-making, Leadership, Other public services | P-C-M | http://peteluanindah-lombokbarat.desa.id/lembaga/detail/pemberdayaan-dan-kesejahteraan-keluarga-5201122008#:~:text=Pemberdayaan%20Kesejahteraan%20Keluarga%2C%20disingkat%20PKK,Gotong%20Royong |
| 19 | Dispertan (Dinas Pertanian dan Ketahanan Pangan) | Department of Agriculture and Food Security or Office of Agriculture and Food Security | LG | Province/regency/city | Decision-making, Leadership, Regional development, Environmental conservation | P-C-M | https://pertanian.jatimprov.go.id/ |
| 20 | Dishub (Dinas Perhubungan) | Department of Transportation or Office of Transportation | LG | Province/regency/city | Decision-making, Leadership, Regional development, Infrastructure development, Other public services | P-C-M | https://dishub.banyuwangikab.go.id/ |
| 21 | Dispenda (Dinas Pendapatan Daerah) | Local Revenue Office or Regional Revenue Agency | LG | Province/regency/city | Decision-making, Leadership, Regional development, Financial management, Other public services | P-C-M | https://bapenda.sumutprov.go.id/website/berita/bpprd-revolusi-wajah-dispenda |
| 22 | UPT(D) Persampahan (Unit Pelaksana Teknis (Daerah) Pengelolaan Sampah) | Technical Implementation Unit (Regional) for Waste Management | LG | Regency | Decision-making, Leadership, Waste management | C-M | https://jdih.banyuwangikab.go.id/dokumen/perbup/PERBUP_NO_14_TAHUN_2023_Perkada_Penetapan_Dok_Renstra_BLUD_DAN_LAMPIRAN.pdf |
| 23 | PDAM (Perusahaan Daerah Air Minum) | Regional Water Supply Company or Local Water Utility | LG | Regency | Decision-making, Leadership, Water resources management | P-C-M | https://pudambanyuwangi.co.id/index.php?r=Artikel/home#focus |
| 24 | Dinas Kebersihan or Dinas Lingkungan Hidup dan Kebersihan | Department of Cleanliness and Environmental Affairs or Department of Environment and Cleanliness | LG | Province/regency/city | Decision-making, Leadership, Environmental conservation, Waste management, Environmental health | C-M | https://dlh.banyuwangikab.go.id/ |
| 25 | Badan Layanan Umum Daerah (BLUD) | Regional Public Service Agency | LG | Regency | Decision-making, Leadership, Other public services | P-C-M | https://www.bpkp.go.id/dan/konten/376/Asistensi-BLUD.bpkp#:~:text=Badan%20Layanan%20Umum%20Daerah%20(BLUD)%20adalah%20Satuan%20Kerja%20Perangkat%20Daerah,mengutamakan%20mencari%20keuntungan%2C%20dan%20dalam |
| 26 | Kementerian Kelautan dan Perikanan (KEMENKOMARVES) | Ministry of Marine Affairs and Fisheries | NG | National | Decision-making, Leadership, Marine resource conservation, Infrastructure development | P-C-M | https://www.apn-gcr.org/organization/ministry-of-marine-affairs-and-fisheries/ |
| 27 | Kementerian Dalam Neger (KEMENDAGRI) | Ministry of Home Affairs | NG | National | Decision-making, Leadership, Regional development | P-C-M | https://www.kemendagri.go.id/ |
| 28 | Kementerian Lingkungan Hidup dan Kehutanan (KLHK) | Ministry of Environment and Forestry (MoEF) | NG | National | Decision-making, Leadership, Environmental conservation | P-C-M | https://www.menlhk.go.id/ |
| 29 | Kemenparekraf (Kementerian Pariwisata dan Ekonomi Kreatif) | Ministry of Tourism and Creative Economy | NG | National | Decision-making, Leadership, Tourism development | P-C-M | https://kemenparekraf.go.id/ |
| 30 | Kementerian Pekerjaan Umum Republik | Ministry of Public Works and Housing of the Republic of Indonesia | NG | National | Decision-making, Leadership, Regional development, Infrastructure development | P-C-M | https://pu.go.id/ |
| 31 | Nahdlatul Ulama (NU) dan tokoh agama lainnya | Nahdlatul Ulama (NU) and other religious figures | NGO | National | Religious affairs | P-C-M | https://www.gramedia.com/literasi/sejarah-nu/ |
| 32 | Forum Banyuwangi Sehat (FBS) | Banyuwangi Health Forum | CBO | Regency | Leadership, Environmental health | P-C-M | https://stikesbanyuwangi.ac.id/soekardjo-terpilih-sebagai-ketua-forum-bwi-sehat/ |
| 33 | HAKLI (Himpunan Ahli Kesehatan Lingkungan Indonesia) | Indonesian Association of Environmental Health Experts (IAEH) | NPO | National | Environmental health | P-C-M | https://pphakli.org/ |
| 34 | Emvitrust (previous EcoRanger ) | Emvitrust | NGO | Regency | Tourism development, Waste management, Environmental conservation, Community well-being | P-C-M | https://emvitrust.id/ |
| 35 | Himpunan Penduduk Pemakai Air Minum (HIPPAM) | The Drinking Water Users’ Association | CBO | District | Leadership, Water resources management | P-C-M | https://repository.unej.ac.id/handle/123456789/84724 |
| 36 | Perhimpunan Hotel dan Restoran Indonesia (PHRI) | Indonesian Hotel and Restaurant Association | TA | National | Tourism development | P-C-M | https://phri.or.id/ |
| 37 | ADUPI (Asosiasi Daur Ulang Plastik Indonesia) | Plastic Recycling Association of Indonesia | TA | National | Plastic reprocessing | C-M | https://www.adupi.org/ |
| 38 | Media channels | Media channels | Media | National | Communication | P-C-M | E.g., Radar Banyuwangi, Banyuwangi 24 jam, RRI, Kompas, Antara |
| 39 | Masyarakat Adat osing | Osing indigenous community | CBO | Regency | Leadership, Community well-being | P-C-M | https://www.gatra.com/news-548531-gaya-hidup-masyarakat-adat-osing-minta-dilibatkan-dalam-pengembangan-desa-wisata-budaya.html |
| 40 | Young on Top Banyuwangi | Young on Top Banyuwangi | CBO | Regency | Leadership, Community well-being, Educational training | P-C-M | https://www.youngontop.com/community/yot-banyuwangi/ |
| 41 | Nasyatul Aisyiah | Women Aisha (in arabic) | NGO | National | Religious affairs, Community well-being | P-C-M | https://muhammadiyah.or.id/2022/12/sejarah-berdirinya-nasyiatul-aisyiyah/ |
| 42 | Fathayat NU | Girls (in arabic) | NGO | National | Religious affairs, Community well-being, Educational training | P-C-M | https://referenceworks.brillonline.com/entries/encyclopedia-of-women-and-islamic-cultures/youth-culture-and-movements-indonesia-fatayat-nu-EWICCOM_00371 |
| 43 | Muhammadiyah | Muhammad (in arabic) | NGO | National | Religious affairs, Community well-being, Educational training | P-C-M | https://muhammadiyah.or.id/ |
| 44 | Sekolah Tinggi Agama Islam (STAI) | Islamic Religious College | RI | National | Religious affairs, Educational training | P-C-M | https://stai-bls.ac.id/ |
| 45 | Greeneration Foundation | Greeneration Foundation | NGO | National | S&I | P-C-M | https://greeneration.org/en/about/ |
| 46 | Sungai Watch | River Watch | NGO | Province | Waste management, Pollution control and reduction | C-M | https://sungai.watch/ |
| 47 | IPRO (Indonesia Packaging Recovery Organisation) | Indonesia Packaging Recovery Organisation | NPO | National | S&I, Waste management, Product manufacturing | P-C-M | https://indonesiapro.org/ |
| 48 | PISCES partnership | PISCES partnership | RI | International | S&I, R&D, Pollution control and reduction | P-C-M | https://www.piscespartnership.org/ |
| 49 | Systemiq | Systemiq | Enterprise | International | R&D, Environmental conservation, Waste management, Marine resource conservation, Pollution control and reduction | P-C-M | https://ecc.co.id/company/site/view/1882 |
| 50 | Alliansi Masyarakat Adat Nusantara (AMAN) | Alliance of Indigenous Peoples of the Archipelago | CBO | National | Leadership, Community well-being | P-C-M | https://www.aman.or.id/ |
| 51 | Indonesia Solid Waste Association (InSWA ) | Indonesia Solid Waste Association (InSWA ) | NPO | National | Waste management, Pollution control and reduction | C-M | https://www.iswa.org/blog/member-display/national-member-indonesia/?v=f214a7d42e0d |
| 52 | Bye Bye Plastic Bag (BBPB) | Bye Bye Plastic Bag | NGO | National | Pollution control and reduction, Educational training | C-M | https://byebyeplasticbags.org/ |
| 53 | PlasticBank Indonesia | Plastic Bank Indonesia | Enterprise | International | S&I, Pollution control and reduction, Educational training | C-M | https://plasticbank.com/about |
| 54 | Pokdarwis | Tourism Awareness Group | CBO | Regency/district | Leadership, Tourism development, Community well-being | P-C-M | https://www.igi-global.com/dictionary/human-resources-in-an-artificial-reef-deployment/109604#:~:text=The%20Tourism%20Awareness%20Group%20(Pokdarwis,of%20tourism%20in%20the%20region. |
| 55 | Pandu Laut Nusantara | Archipelago Sea Scout | CBO | National | Leadership, Marine resource conservation, Pollution control and reduction, Educational training | P-C-M | https://www.pandulaut.org/en/tentang |
| 56 | Eco Nusa Foundation | Eco Nusa Foundation | NPO | National | Environmental conservation, Community well-being, Educational training | P-C-M | https://econusa.id/en/about-us/ |
| 57 | Yayasan Konservasi Laut (YKL) | Indonesian Marine Conservation Foundation | NGO | National | Marine resource conservation, Educational training | P-C-M | https://yklindonesia.org/ |
| 58 | Coordinating Ministry for Maritime & Investment Affairs (CMMAI) | Coordinating Ministry for Maritime & Investment Affairs (CMMAI) | NG | National | Decision-making, Leadership, Marine resource conservation, Pollution control and reduction, Financial management | P-C-M | https://maritim.go.id/ |
| 59 | Indonesian Waste Platform (IWP) | Indonesian Waste Platform (IWP) | NPO | National | Waste management | C-M | https://internationalwasteplatform.org/indonesian-wast-platform/ |
| 60 | APSI (Asosiasi Pengusaha Sampah Indonesia) | Indonesian Association of Waste Entrepreneurs | TA | National | Waste management, Plastic reprocessing | C-M | https://apsiindonesia.org/ |
| 61 | Asosiasi Industri Olefin, Aromatik & Plastik Indonesia (INAPLAS) | The Indonesian Olefin, Aromatic and Plastic Industry Association | TA | National | Product manufacturing | P-C | http://www.inaplas.net/index.php/profile |
| 62 | Sistem Informasi Pengelolaan Sampah Nasional (SIPSN) | National Waste Management Information System | NG | National | Decision-making, Leadership, Waste management | C-M | https://sipsn.menlhk.go.id/sipsn/ |
| 63 | National Plastic Action Partnership (NPAP) | National Plastic Action Partnership (NPAP) | IGB (part of GNPAP) | International | Decision-making, Pollution control and reduction, Waste management, Marine resource conservation | P-C-M | https://www.globalplasticaction.org/countries |
| 64 | United Nations Economic and Social Commission for Asia and the Pacific (UN-ESCAP) | United Nations Economic and Social Commission for Asia and the Pacific (UN-ESCAP) | IGB | International | Decision-making, Regional development, Infrastructure development | P-C-M | https://www.un.org/ldcportal/content/un-economic-and-social-commission-asia-and-pacific-escap-0 |
| 65 | Institute for Global Environmental Strategies (IGES) | Institute for Global Environmental Strategies (IGES) | RI | International | R&D, S&I, Environmental conservation | P-C-M | https://www.iges.or.jp/en/about |
| 66 | Sustainable Waste Indonesia (SWI) | Sustainable Waste Indonesia (SWI) | Enterprise | National | Waste management, Plastic reprocessing, Pollution control and reduction | C-M | https://sw-indo.com/home/ |
| 67 | United Nations Environment Programme (UNEP) International Environmental Technology Centre (IETC) | United Nations Environment Programme (UNEP) International Environmental Technology Centre (IETC) | IGB | International | Decision-making, Waste management, Regional development, R&D | P-C-M | https://www.unep.org/ietc/#:~:text=The%20United%20Nations%20Environment%20Programme,other%20countries%20around%20the%20world. |
| 68 | Lembaga Ilmu Pengetahuan Indonesia (LIPI) | Indonesian Science Institute | RI | National | R&D, Educational training | P-C-M | https://www.uni-goettingen.de/en/indonesian+institute+of+science+%28lipi%29/412126.html |
| 69 | Badan Pengawas Obat dan Makanan (BPOM) | Food and Drugs Administration of Indonesia (BPOM) | NG | National | Decision-making, Leadership, Environmental health | P-C-M | https://business-indonesia.org/bpom_food_medicine |
| 70 | Indonesian Packaging Federation (IPF) | Indonesian Packaging Federation (IPF) | TA | National | S&I, Product manufacturing, Educational training | P-C | https://packindo.org/ |
| 71 | European Investment Bank (EIB) | European Investment Bank (EIB) | FI | International | S&I, Financial management, Environmental conservation, Infrastructure development, Regional development | P-C-M | https://www.eib.org/en/index |
| 72 | Asian Development Bank (ADB) | Asian Development Bank (ADB) | FI | International | R&D, Financial management, Infrastructure development, Regional development | P-C-M | https://www.adb.org/ |
| 73 | Komisi Pemberantasan Korupsi (KPK) | Indonesia’s Corruption Eradication Committee | NG | National | Decision-making, Leadership | P-C-M | http://www.kpk.go.id/ |
| 74 | UK Research and Innovation's (UKRI) | UK Research and Innovation's (UKRI) | FI (Funding agency) | International | S&I, Financial management, R&D, Infrastructure development, Environmental conservation | P-C-M | https://www.ukri.org/ |
| 75 | Global Challenges Research Fund (GCRF) | Global Challenges Research Fund (GCRF) | FI | International | Financial management, R&D, S&I, Regional development, Infrastructure development, Environmental conservation | P-C-M | https://www.ukri.org/what-we-do/browse-our-areas-of-investment-and-support/global-challenges-research-fund/ |
| 76 | UK Universities (Brunel University London, University of Leeds, University of Plymouth and University of Strathclyde) | UK Universities (Brunel University London, University of Leeds, University of Plymouth and University of Strathclyde) | RI | International | Educational training, S&I, R&D - As part of PISCES and Systemiq collaboration | P-C-M |  |
| 77 | Indonesian Universities (Institut Teknologi Bandung, Institut Teknologi Sepuluh Nopember, Universitas Esa Unggul, Airlangga and Udayana) | Indonesian Universities (Institut Teknologi Bandung, Institut Teknologi Sepuluh Nopember, Universitas Esa Unggul, Airlangga and Udayana) | RI | National | Educational training, S&I, R&D - - As part of PISCES and Systemiq collaboration | P-C-M |  |
| 78 | Badan Riset dan Inovasi Nasional (BRIN) | The Indonesia National Research and Innovation Agency | NG | National | Decision making, Leadership, Environmental conservation, R&D, Regional development | P-C-M | https://www.brin.go.id/ |
| 79 | The Asian Institute of Technology (AIT) | The Asian Institute of Technology | RI | International | Educational training, R&D | P-C-M | https://ait.ac.th/ |
| 80 | Waste4Change | Waste4Change | Enterprise | National | Educational training, Waste management, Plastic reprocessing, Pollution control and reduction | C-M | https://waste4change.com/?lang=en |
| 81 | Deutsche Gesellschaft für Internationale Zusammenarbeit GmbH (GIZ) | Deutsche Gesellschaft für Internationale Zusammenarbeit GmbH (GIZ) | NPO | International | Environmental conservation, Regional development | P-C-M | https://www.giz.de/en/worldwide/352.html |
| 82 | Clean Oceans through Clean Communities (CLOCC) | Clean Oceans through Clean Communities (CLOCC) | NPO | International | Pollution control and reduction, Marine resource conservation, Waste management | C-M | https://www.cloccglobal.org/about |
| 83 | Ikatan Pemulung Indonesia (IPI) | Indonesian Scavenger Association | CBO | National | Leadership, Educational training, Waste management, Community well-being | C-M | https://www.equaltimes.org/why-informal-workers-are-opposing?lang=en. https://globalrec.org/organization/ikatan-pemulung-indonesia-indonesia-waste-pickers-union-ipi/. |
| 84 | Asosiasi Pemulung dan Pelapak Indonesia (APPI) | Indonesia Scavengers and Waste Collectors Association | CBO | National | Leadership, Educational training, Waste management, Community well-being | C-M | https://koran-jakarta.com/asosiasi-pelapak-dan-pemulung-indonesia-berpartisipasi-pada-vaksinasi-di-tpa-sumurbatu?page=all |
| 85 | Indonesia Plastic Recylers (IPR) | Indonesia Plastic Recylers (IPR) | TA | National | Plastic reprocessing | C-M | https://iprofficial.com/ |
| 86 | Packaging and Recycling Association for Indonesia Sustainable Environment (PRAISE) | Packaging and Recycling Association for Indonesia Sustainable Environment (PRAISE) | TA | National | S&I, Waste management | P-C-M | https://praiseindonesia.com/ |
| 87 | Asosiasi Bank Sampah Indonesia (ASOBSI) | Indonesia Waste Bank Association | NPO | National | Waste management, Pollution control and reduction | C-M | https://www.sitinurbaya.com/asosiasi-bank-sampah-indonesia |
| 88 | Alliance to End Plastic Waste (AEPW) | Alliance to End Plastic Waste (AEPW) | NPO | International | Waste management, Pollution control and reduction, Plastic reprocessing, S&I, Educational training | P-C-M | https://endplasticwaste.org/ |
| 89 | BINTARI Foundation | The Indonesian Association for Sustainable Development | NGO | Province | Environmental conservation | P-C-M | https://bintari.org/en/ |
| 90 | World Bank | World Bank | IGB | International | Decision-making, Financial management, Regional development, Infrastructure development, R&D, Environmental conservation | P-C-M | https://www.worldbank.org/en/home |
| 91 | Asosiasi Industri Plastik Hilir Indonesia (APHINDO) | Indonesian Upstream Plastics Industry Association | TA | National | Product manufacturing | P-C | https://ekonomi-bisnis-com.translate.goog/read/20211208/257/1475388/industri-plastik-hilir-hadapi-pemulihan-tak-merata?_x_tr_sl=id&_x_tr_tl=en&_x_tr_hl=el&_x_tr_pto=wapp |
| 92 | Aliansi Zero Waste Indonesia (AZWI) | Indonesian Zero Waste Alliance | NPO | National | S&I, Waste management | P-C-M | https://aliansizerowaste.id/ |
| 93 | ROTOKEMAS Indonesia | Indonesian Flexible Packaging Industries Association | TA | National | Product manufacturing | P-C | https://rotokemas.id/ |
| 94 | Gabungan Produsen Makanan Minuman Indonesia (GAPMMI) | Indonesian Food and Beverage Entrepreneurs Association | TA | National | Product manufacturing | P-C | https://gapmmi.id/ |
| 95 | Siklus Refill | Refill Cycle | NPO | National | S&I | P-C-M | https://www.siklus.com/en/home |
| 96 | ASOSIASI PENGUSAHA RITEL INDONESIA (APRINDO) | Indonesian Retail Entrepreneurs Association | TA | National | Product manufacturing | P-C | https://www.aprindo.org/ |
| 97 | Indonesia Global Compact Network (IGCN) | Indonesia Global Compact Network (IGCN) | NPO | National | Community well-being, Regional development, Environmental health | P-C-M | https://www.indonesiagcn.org/ |
| 98 | Wahana Lingkungan Hidup Indonesia (WALHI) | Indonesian Forum for the Environment | NGO | National | Environmental conservation, Community well-being | P-C-M | https://en.walhi.or.id/ |
| 99 | The Nature Conservancy ( TNC) Indonesia | The Nature Conservancy (TNC) Indonesia | NGO | National | Environmental conservation | P-C-M | https://www.nature.org/en-us/about-us/where-we-work/asia-pacific/indonesia/, https://www.ecohubmap.com/company/NGO/the-nature-conservancy-tnc-united-kingdom/4e66hkle17smic |
| 100 | PT Sarana Multi Infrastruktur (Persero) (PT SMI) | State-Owned Enterprise (SOE) with its total capital shares owned by the Republic of Indonesia through the Ministry of Finance | FI | National | S&I, Financial management, Infrastructure development | P-C-M | https://ptsmi.co.id/ |
| 101 | National Center for Corporate Reporting (NCSR) Indonesia | National Center for Corporate Reporting (NCSR) Indonesia | NPO | National | Communication, Educational training, S&I, Regional development | P-C-M | https://nccr.id/ |
| 102 | Global Reporting Initiative (GRI) Indoensia | Global Reporting Initiative (GRI) Indoensia | NPO | International | Communication, Educational training, S&I, Regional development | P-C-M | https://www.globalreporting.org/how-to-use-the-gri-standards/gri-standards-bahasa-indonesia-translations/ |
| 103 | Indonesian Institute for Forest and Environment (RMI) | Indonesian Institute for Forest and Environment | NGO | National | Environmental conservation | P-C-M | https://rmibogor.id/ |
| 104 | Kementerian Perindustrian (Kemenperin) | Ministry of Industry (Directorate of Beverage Industry, Tobacco Products, and Refreshment Materials) | NG | National | Decision-making, Leadership, Product manufacturing | P-C | https://www.kemenperin.go.id/ |
| 105 | BAPPENAS | Ministry of National Development Planning of the Republic of Indonesia/ National Development Agency (Directorate of Housing and Settlements) | NG | National | Decision-making, Leadership, Regional development, Financial management | P-C-M | https://www.bappenas.go.id/en |
| 106 | Asosiasi Pemerintah Kabupaten Seluruh Indonesia(APKASI) | Association of Indonesian Regency Governments | NG | National | Decision-making, Leadership, Regional development | P-C-M | https://apkasi.org/ |
| 107 | Lembaga Kebijakan Pengadaan Barang/Jasa Pemerintah (LKPP) | National Public Procurement Agency | NG | National | Decision-making, Leadership | P-C-M | https://www.lkpp.go.id/ |
| 108 | Enviu | Enviu | NPO | International | S&I, Product manufacturing | P-C | https://enviu.org/region/indonesia/ |
| 109 | Bebas Sampah ID (BSID) | Information Portal and National Waste Collaboration Forum - Zero Waste ID (BSID) | NPO | National | Waste management, Communication, Educational training | C-M |  |
| 110 | Sistem Online Manajemen Sampah (Smash) | Online waste management system in Indonesia | Enterprise | National | Communication, Waste management, Plastic reprocessing, Pollution control and reduction | C-M | https://smash-id.translate.goog/?_x_tr_sl=id&_x_tr_tl=en&_x_tr_hl=el&_x_tr_pto=wapp#section-about |
| 111 | French Development Agency (AFD) |  | FI | International | Financial management, R&D, S&I, Infrastructure development | P-CM |  |
| 112 | Norad | Norwegian Agency for Development Cooperation | Norwegian NG | International | Waste management, R&D | P-C-M | <https://www.cloccglobal.org/>  **Although not included in the typology and analysis due to its unique status as a foreign government stakeholder, its role in the CLOCC program is acknowledged in our preliminary system analysis.** |

1. **Roles of external stakeholders in the plastics value chain at national and regency level**

To assess the power dynamics of external stakeholders within a system, it is crucial to understand the roles of various stakeholder categories. This understanding should take into account the potential challenges these stakeholders face, as well as how their key activities contribute to enhancing improvements in the system (Gerassimidou et al., 2022). **Table C1** presents a generalized overview of the role and challenges faced by the 11 categories of external stakeholders within the Indonesian plastics value chain. **Table C1** serves as a foundational reference for assessing the interactions among these stakeholders and understanding their power dynamics.

**Table C1 Description of the key roles and potential challenges of external stakeholder categories in plastics value chain in Indonesia**

| Category | Role | Potential challenges |
| --- | --- | --- |
| Local government (LG) | In the form of various institutional forms such as agencies, divisions, and regional companies:   - Implement policies to prevent plastic pollution, including river debris removal and household waste collection (Wikurendra et al., 2024, Prabawati et al., 2023) - Enforce waste management policies and ensure compliance (Becerra, 2021) - Collaborate with neighbourhood organisations (“Rukun Tetangga”, or “RT”) and community organisations (“Rukun Warga”, or “RW”) often through the establishment of waste banks (Maryanti, 2017) - Create Regional and Governor regulations through delegation and attribution, facilitating the governance and autonomy of local areas (Purba and Erliyana, 2020) | - Insufficient funding due to prioritization of resources for healthcare, education, irrigation, and road infrastructure (NPAP, 2020b) resulting in budget allocation and accountability issues affecting the attention and resources allocated to plastics sustainability in government agendas (Wikurendra et al., 2024) - Funding limitations also hinder effective waste management operations (Becerra, 2021) leading to inadequate human resources, technology, and infrastructure (Patton and Li, 2021). - Lack of standardized practices leading to overlapping roles between operators and regulators, unclear procedures, coordination problems among waste sector agencies (Wikurendra et al., 2024, Systemiq, 2021a) and delays in policy implementation (Ratnasari et al., 2023). - Limited authority for Governor regulations compared to Regional Regulations creates constraints in addressing local issues (Purba and Erliyana, 2020) |
| National government (NG) | - Provide support for legal frameworks, financing mechanisms, and governance related to public budgets, infrastructure, regulation and tax regime (Wikurendra et al., 2024), including the overarching policy framework for tracking progress and allocating funding for infrastructure projects related to SWM (Systemiq, 2021b) - Exert authority in areas such as foreign policy, defense, security, justice, monetary policy, fiscal matters, and religious affairs (Purba and Erliyana, 2020) - Promote sustainable production practices by issuing permits, conducting inspections, and providing technical guidance on environmental compliance (UNDP, 2022) - Support the production cycle conducted by businesses and NPOs (UNDP, 2022) - Promote development projects, e.g., the Ministry of Industry incentivizes USD 31 billion in investments to enhance the petrochemical sector, aiming to replace imports of raw materials for plastic manufacturing (USAID, 2022). - Boost recycling businesses and waste collector workforce (USAID, 2022), e.g., the Ministry of Industry supports plastic recycling through fiscal incentives, including access to bank loans for small and medium recycling businesses, elimination of the 10% value-added tax (PPN) for the sector, and regulations to promote the use of recycled plastic in industries like beverages (USAID, 2022). | - Limited effectiveness of national policies at Extended Producer Responsibility (EPR) and reducing single-use plastic due to (Becerra, 2021): - Insufficient enforcement - Limited engagement from the private sector in adopting sustainable practices - Ineffective pricing mechanisms that fail to incentivize sustainable practices - Resistance from plastic manufacturers to regulatory changes - Bureaucratic complexities (Arisman and Fatimah, 2023) and absence of strict penalties for EPR non-compliance (Systemiq, 2021b), e.g., waste management master plans lack specified funding levels and enforcement mechanisms (Systemiq, 2021b). - Lack of continuity in leadership within the waste management system driven by frequent rotations of government officials across agencies or departments (Systemiq, 2021a). |
| Intergovernmental bodies (IGB) | - Implement global and regional intergovernmental frameworks in developing countries, such as Indonesia, by establishing binding instruments to enhance sustainability, i.e., legal agreements or treaties (UNEP, 2022) - Set regulatory policy targets for waste management and tackling plastic pollution (NPAP, 2020a) - Facilitate access to technology, capacity building and scientific and technical cooperation (UNEP, 2022). | - Need to advance effective global collaboration (UNEP, 2022) - Consensus among member states on a clear definition of a legally binding instrument to ensure a unified understanding of mandatory and voluntary aspects (UNEP, 2022) - Ensure synergy between the existing policies and the legally binding instruments to end plastic pollution (UNEP, 2022) |
| Community-based organizations (CBO) | - Engage the community and empower locals to make decisions about income generation, employment, and environmental and cultural preservation (Taufik, 2022). - Foster a sense of community identity and pride, enhancing community ownership and belonging (Taufik, 2022). - Advocate for the rights and welfare of waste pickers and recyclers through associations like Indonesia Scavengers Association (IPPI) and the Indonesia Scavengers and Waste Collectors Association (APPI) (Kristanto et al., 2022). - Coordinate activities and build social networks among members (Kristanto et al., 2022). | - Struggle to support member welfare and protect waste pickers from exploitation (Fathy, 2019). - Inefficient organizational structure, e.g., IPI claims a membership of 3.7 million with activities mainly centered around Jakarta (Kristanto et al., 2022). - Face challenges in effectiveness (Kristanto et al., 2022), e.g., APPI encounters difficulties in advocating for waste pickers' rights; (Fathy, 2019). - Confront power dynamics that reflect the broader socioeconomic landscape, where informal waste pickers and recyclers seek recognition and support from governmental and formal sectors (Fathy, 2019). |
| Non-governmental organizations (NGO) | - Operate in information literacy to the public, liaison of cooperation networks, and monitoring and evaluation of policies (Wikurendra et al., 2024, Latanna et al., 2023) - Advance a circular plastics economy by supporting community waste management and promoting plastic recycling (UNDP, 2022). - Collaborate with the packaging industry to develop recycling models that encourage consumer participation in reducing plastic waste (Becerra, 2021). - Enhance waste management systems by supporting waste banks, connecting with private recyclers, and coordinating with municipal solid waste operators (Becerra, 2021). - Contribute to environmental advocacy for bans on single-use plastics and offer community education on plastic waste (UN-ESCAP, 2021). | - Limited resources can hinder the scalability and effectiveness of their initiatives (Ouro-Salim et al., 2024) - Challenges in establishing sustainable partnerships with municipal operators and private recyclers due to lack of recognition (Ouro-Salim et al., 2024) |
| Trade associations (TA) | - Serve as crucial intermediaries between the government and businesses, facilitating communication and collaboration - Promote the adoption of circular business models to mitigate the environmental impact of plastic waste (USAID, 2022), e.g., the Indonesian Retail Entrepreneurs Association (APRINDO) raises awareness and educates retail entrepreneurs on sustainable practices to foster commitment to environmental responsibility, reduce plastic waste, and support efforts to control plastic pollution in Indonesia's retail industry (APRINDO, 2018). - Implement policy-based, material-based, technological-based and social-based interventions towards sustainability, e.g., i) the Indonesian Olefin, Aromatic and Plastic Industry Association (INAPLAS) analyzes public and fiscal policies in plastic sheet manufacturing and engages in waste management initiatives (USAID, 2022), ii) APRINDO advocates for eco-friendly policies and regulations in the retail sector (APRINDO, 2018); iii) the Packaging and Recycling Association for Indonesia Sustainable Environment (PRAISE) supports behavioral change activities (Arisman and Fatimah, 2023) - Enhance waste management practices and resource efficiency across the plastics value chain, e.g., the Plastic Recycling Association of Indonesia (ADUPI), the Indonesia Plastic Recyclers (IPR), and the Indonesian Association of Waste Entrepreneurs (APSI) form extensive collaborations within the Indonesia’s plastic recycling and waste management sector (USAID, 2022) | - Harmonizing often-opposing expectations and priorities among members with potentially conflicting financial interests (Gerassimidou et al., 2022) - Managing the inherent complexities and dynamism of a multiple supply network built on short- to medium-term, opportunistic, and ad-hoc collaborations (Gerassimidou et al., 2022) - Aligning member activities with evolving regulations related to sustainable system (Gerassimidou et al., 2022) - Ensuring the trade association's financial sustainability while simultaneously supporting members' financial interests and promoting sustainable practices (Gerassimidou et al., 2022) - Effectively addressing and mitigating the inherent risks associated with short- to medium-term supply agreements (Gerassimidou et al., 2022) |
| Research institutions (RI) | - Conduct research activities and innovation of technologies (Wikurendra et al., 2024) to develop long-term solutions towards sustainability (Kurniawan et al., 2024) - Provide scientific recommendations (Wikurendra et al., 2024) and advocate for policy changes and contribute to capacity building and knowledge exchange (IGES, 2024) - Contribute to local planning efforts by hosting public education initiatives such as workshops, seminars, and discussions led by waste management experts (UN-ESCAP, 2021) | - Research capacity constraints such as limited resources and funding (Gerassimidou et al., 2022) - Restricted capacity to influence policy and decision-making processes with their research findings (Gerassimidou et al., 2022) - Difficulty translating research findings into tangible, real-world impact (Gerassimidou et al., 2022) - Insufficient networks for effectively disseminating scientific findings and research support (Gerassimidou et al., 2022) - Limited involvement of external stakeholders beyond knowledge-base improvement and knowledge transfer activities (Gerassimidou et al., 2022) |
| Financial institutions (FI) | - Unlock financial and infrastructure lock-ins in waste management by (Systemiq, 2021a, Rimantho et al., 2023): - Providing long-term financing for projects (Becerra, 2021) - Attracting private sector investments (Becerra, 2021) | - Immature investment readiness due to lack of enabling conditions such as regulatory environments, technology, and blended finance approaches (e.g., public-private partnerships) leads to investor reluctance arising from perceived risks and uncertain returns (NPAP, 2020a). - Key criterion the involvement of national government for investing in SWM projects due to challenges with regional budgets and revenue repayment. - Lack of stable revenue inflow, which is an important precondition for investment in SWM. - Wide range of technologies and variable quality of plastic waste. |
| Non-profit organizations (NPO) | - Actively involved in the plastics value chain, facilitating environmental sustainability efforts (Systemiq, 2021a, Becerra, 2021). - Implement EPR (Systemiq, 2021a) (Systemiq, 2021b), e.g., the Indonesia Packaging Recovery Organization (IPRO) dedicated to promoting producer engagement in EPR practices to convert packaging waste into valuable resources by implementing a take-back program for post-consumer packaging recycling (Becerra, 2021, Arisman and Fatimah, 2023, Patton and Li, 2021, Systemiq, 2021b) - Support key waste management facilities, including Material Recovery Facilities (MRF), sorting facilities, and waste banks (Systemiq, 2021a) - Enhance environmental quality by promoting waste management practices such as waste bank operations, e.g., the Indonesia Waste Bank Association (ASOBSI) (Becerra, 2021) | - Limited operational funding and resources to effectively implement and scale their initiatives leading to difficulty in participating in complex partnerships (Del Pilar Quiroz Galvan et al., 2021) - Difficulty navigating differing priorities between partners (Del Pilar Quiroz Galvan et al., 2021) - Challenges in maintaining consistent engagement and commitment from various stakeholders in waste management (Del Pilar Quiroz Galvan et al., 2021) - Difficulties in measuring the direct impact of their efforts on the broader waste and materials market (Del Pilar Quiroz Galvan et al., 2021) |
| Enterprise | - Involvement of environmental enterprises similar to this of NGOs; advocating for responsible waste management solutions, including educational, waste management and capacity building activities (Patton and Li, 2021) - Focus on technology-driven strategies (Becerra, 2021) - Build economically sustainable programs (CLOCC, 2021) - Develop collaboration with industry in developing sustainable, circular, innovative materials for everyday use, such as returnable container schemes and long lasting goods (Patton and Li, 2021) | - Need for stronger advocacy (Piila et al., 2022) - Technological limitations, including access to funding, resources, and expertise (Piila et al., 2022) - Risks on inadequate market demand for sustainable solutions (Piila et al., 2022) - Collaboration barriers with industry due to challenges related to technological limitations, including access to funding, resources, and expertise. |
| Media | - Influence consumer perceptions and purchasing decisions, impacting the reputation, sales, and overall success of consumer goods producers. - Shape knowledge, perceptions and consumer behaviour in terms of how plastic finished goods are perceived and purchased by promoting sustainable packaging choices (Henderson, 2023) - Construct citizenship through competing discourses of responsibility by raising awareness about plastic pollution issues, and informing the public about relevant policies and solutions shaped by the government and private sector (Henderson, 2023) | - Limited reach and engagement leading to insufficient awareness and understanding of sustainable packaging and plastic pollution issues (Pereira et al., 2024) - CE marketing campaigns need improvement in design and targeting (Esposito et al., 2024, Pereira et al., 2024) - Insufficient collaboration between academics and marketing professionals (Pereira et al., 2024) - Resistance to change by consumers (Pereira et al., 2024) - Fragmented media landscape that can dilute messages in maintaining consistent communication regarding sustainability initiatives (Esposito et al., 2024) |

Among the combinations of activities undertaken by various stakeholder categories, *Waste Management (7)* and *Pollution Control Reduction (8)* are considered as the most pertinent to addressing plastic waste mismanagement in Banyuwangi Regency. **Table C2** presents an overview of how these two referencing activities are synergistically integrated with others based on the activities of the 111 stakeholders, i.e., interrelationships and potential interactions, to enhance the sustainability performance of the plastics value chain in the region, including representative stakeholders involved in executing the respective activities. The combinations presented in **Table C2** were identified based on literature evidence on the activities undertaken by the 111 stakeholders involved in the plastics value chain in Banyuwangi Regency by reviewing the stakeholders' roles, functional areas and the specific contributions they make to *Waste management* *(7)* and *Pollution control reduction (8)*. These combinations are not exhaustive; they have been deliberately selected as delegates to exemplify the potential or actual integration of activities within the plastics value chain in Banyuwangi Regency. The combinations in **Table C2** were selected with a focus on identifying activities that directly support one another to ensure that the identified combinations are both relevant and reflective of the complex dynamics within the system. While the synergies among these activities may also pertain to other activities, **Table C2** emphasizes the direct synergies among activities. For example, in the second combination of **Table C2**, the integration of the reference activities (*7+8*) with *Regional development* *(4)* and *Environmental health* *(11)* may indirectly influence *Community well-being (3)*;however, the latter is not primarily designated as an activity involving focused stakeholder participation in that particular combination.

**Table C2 Description of synergies, including interrelationships and potential interactions, among stakeholder activities to enhance the sustainability of the plastics value chain in Banyuwangi Regency (Note: *Waste Management (7)* and *Pollution Control Reduction (8)* are used as reference combinations)**

| *Activity* [*(7) + (8)*] combined with activity*: | Synergistic stakeholder activities in the plastics value chain in Banyuwangi Regency | Issues to resolve for effective strategy |
| --- | --- | --- |
| *[(1)+(2)]* | *Waste management* authorities in the Indonesian context are diverse and involve multiple sectors (Wikurendra et al., 2024):  **NG**: Ministry of Environment and Forestry (MoEF) responsible for policies and regulations on [(7) + (8)]; Ministry of Public Works and Housing (MPWH) provides technical advice, promotes pilot projects, and supervises large-scale waste management facilities (7); Ministry of Home Affairs and the Ministry of National Development Planning (BAPPENAS) works on capacity building of municipalities in MSW management (7); Coordinating Ministry for Marine Affairs and Investment (CMMAI) leads the coordination between MoEF and MPWH (Systemiq, 2021b, GIG, 2018)  **LG**: Technical Implementation Unit (Regional) for Waste Management responsible for planning and implementing SWM (7); Environment Agency (DLH) responsible for MSW monitoring and coordinating the 3R program with CBO, NGO, and private sector (7); Department of Environment and Cleanliness (Dinas Kebersihan) works on MSW management [(7)+(8)] (GIG, 2018) | - Waste management is not classified as a Mandatory Basic Service, resulting in reduced government prioritization and funding, and inadequate service levels (Systemiq, 2021a), regulations, and enforcement (CLOCC, 2021); DLH should ensure universal access to waste services (Systemiq, 2021a) - 2018 targets for improving household waste management remain unmet (CLOCC, 2021) - Trust issues due to concerns about authorities’ knowledge, financial transparency, and skills in waste management (CLOCC, 2021) - 54 of 189 villages have formal MSW collection; only 37 charge a waste collection fee; rural areas mainly use dumpsites and open burning (CLOCC, 2021) |
| [*(4)+(11)*] | Based on Article 7 Regulation No. 2 of 2020 by the Regency of Banyuwangi on poverty reduction, “*the poor has rights to obtain a healthy living environment*” (JDIH, 2020).  **LG**: Regent of Banyuwangi has established the Banyuwangi Health Forum (FBS), reporting to the Regional Development Planning Agency (Bappeda), supported by the Banyuwangi Regency's budget (APBD) in the form of awards for Banyuwangi Regency (JDIH, 2015), such as Adipura Program, led by MoEF, promoting enhanced waste management and cleanliness initatives across 380 cities (Ratnawati et al., 2020).  **CBO**: Banyuwangi Health Forum (FBS) promote a clean, comfortable, safe, and healthy living environment through health programs in synergy with government policies and community participation (JDIH, 2015).  **Example:** The waste facility in Tembokrejo Village, built by Project STOP (Stop Ocean Plastics) Muncar, received Adipura award as outstanding waste management initiative (STOP, 2024). | - The environment category in Banyuwangi's local government budget (APBD) receives only 1-2%, significantly less than health, education, and public works allocations (Systemiq, 2021a) - According to a women’s survey regarding waste practices in the regency, one of the most important challenges on waste generation in a daily basis is that poor waste practices lead to odour, mosquitos attraction and children injuries (CLOCC, 2021). - The formal disposal site (TPA) of the regency is not considered a sanitary landfill, while it has limited environmental control in terms of environmental protection in place due to poor operating standards (CLOCC, 2021). |
| [*(15)*+*(19)*+*(21)*] | **NPO and RI**: Enviu (NPO) in collaboration with PISCES (led by RI) have created and scaled innovative solutions of reusable and refillable plastics tested in the PISCES living laboratory, pushing the Banyuangi market towards zero-use plastic waste (PISCES, 2024, Enviu, 2024) | - A successful initiative run be Enviu and PISCES at pilot scale that was interrupted due to limited funding. - There are national TA that combine *(19)*+*(21)*; however, there have been no outcomes from these efforts in Banyuwangi yet. |
| [*(19)*+*(20)*] | Leveraging digitalization and artificial intelligence to enhance waste management (Kurniawan et al., 2024, Kurniawan et al., 2023, Arisman and Fatimah, 2023) can achieve waste reduction targets and enhance local effectiveness and enhance local waste management, e.g., robotics for recycling, (Kurniawan et al., 2023, USAID, 2022); digital tools can facilitate the implementation of monitoring plans that enhance transparency in plastic waste management, including tracking the activities of the informal recycling sector (IRS) (UN-ESCAP, 2021) which is crucial for recycling facilities, e.g., 70% of the feedstock used in recycling businesses typically comes from the IRS (CLOCC, 2021)  **Example**: Regency government is leveraging digital technology for rural development (Indraprahasta et al., 2022) to enhance budget efficiency, public services, innovation, and transparency in financial reporting and open communication (Maulana and Wicaksono, 2022), such as program Smart Kampung (i.e., village) – an information technology program – for more effective government services and to advance local human resources (Wulandari et al., 2020) | - The implementation of digital tools regarding *(7)* and *(8)* is still missing; waste fees were collected manually resulting in unpredictable and unreliable revenues from month to month (Systemiq, 2021a) - Among the 13 recycling facilities, only three were classified as *full control* (i.e., built with regulatory compliance, include environmental and occupational protection measures, fulfil market specifications for recycling in terms of separation and pre-processing, monitoring of input and output materials including weighing and recording) - Financial barriers for technological development (Arisman and Fatimah, 2023) |
| [*(2)*+*(17)*] | Sustainability of the system requires synergy among other ministries services (Wikurendra et al., 2024, Hannon, 2020)  **LG**: DLH agency actively participate in budget decision-making processes for waste systems (Systemiq, 2021a),  **Example**: The Regional Public Service Agencies (BLUD) that is responsible for *(17)*, in Banjar Regency successfully manage waste governance by promoting institutional independence, centralized coordination, and diverse revenue sources (Systemiq, 2021a). BLUD can enhance accountability and efficiency in waste management from collection to disposal (Systemiq, 2021a). Rather than relying on uncertain revenue allocation from the APBD for waste management, BLUD allows for direct allocation of revenues to waste management, bypassing the APBD and ensuring effective use of funds (Systemiq, 2021a). Pilot BLUD governance initiatives are scheduled for implementation in Malang (supported by the Bersih Indonesia program) and Jembrana (supported by Project STOP Jembrana) Regencies (Systemiq, 2021a). | - In the list of 112 stakeholders, none currently combine activity *(17)* with *(7)* and/or *(8)* in Banyuwangi - Innovative pilot projects based on the BLUD framework are needed in Banyuwangi to overcome stakeholder resistance and improve waste management systems. Additionally, BLUD allows direct allocation of revenues to waste management, ensuring effective use of funds. |
| [*(3)*+*(14)*] | All stakeholders involved must recognize that increased tourism leads to higher waste generation and that inadequate infrastructure paired with tourist discipline issues negatively impacts the environment and the tourism sector (Argo and Rachmawati, 2021, Taufik, 2022).  **IGB**: NPAP policy roadmap proposed to legally restrict hotels and temporary accommodations from using small plastic bottles for personal care products, initially targeting larger establishments, with a transitional period for smaller hotels, supported by enforcement measures and involving local authorities in its implementation by 2023 (NPAP, 2022)  **CBO**: The Tourism Awareness Group (Pokdarwis) promotes tourism self-reliance and community well-being through community based tourism and ecotourism generating additional income (Taufik, 2022).  **Example**: Tourism fosters societal welfare improvements, demonstrated by Pokdarwis' efforts in Kemiren village, in Banyuwangi, integrating local customs and culture through innovative festivals, supporting SDGs (Taufik, 2022) | - Banyuwangi's tourism sector is economically significant (Bresnahan, 2020) and a priority for local governmental development efforts (Ministry of Tourist Republic of Indonesia, 2020) - Tourist numbers rose from 1.07 million to 5.41 million between 2013 and 2019, boosting local economic efforts (Indraprahasta et al., 2022) - Misaligned expectations and communication breakdowns with local governments remain issues, as seen in a case from Malang Regency (Asmoro et al., 2019) |
| *(18)* | In Banyuwangi villages, the ‘gesah’ culture, which promotes casual conversations, enhances social cohesion and facilitates social change within the community (Taufik, 2022)  **Media**: Integrating this culture with communication strategies focused on proper purchasing, disposal, and consumption behaviors and engaging stakeholders, particularly government entities, in effective communication via social media and technology can lead to positive change within the community (Ratnasari et al., 2023).  **Example**: The PISCES project has been featured in various media outlets. | - The interest level of the Media remains low (see Mendelow matrix in **Figure 2**) |
| [*(5)*+*(12)+(15)*] | Development banks offer significant resources for knowledge and technology enhancement, as well as for infrastructure projects focused on waste management (Systemiq, 2021a)  **FI and RI**: the PISCES project, led by RI and funded by FI, UK Research and Innovation (UKRI), and the Global Challenges Research Fund (GCRF), conducts impact assessments and system analytical studies to identify points of intervention within Indonesia's plastics value chain, using Banyuwangi as a case study. (PISCES, 2024)  **Enterprise**: Systemiq involved in project Project STOP Banyuwangi Hijau to achieve zero ocean plastic leakage (Patton and Li, 2021), providing waste collection to 400,000 people, creating 300 job positions in the waste sector, and collecting nearly 9,000 metric tons of plastic (Borealis, 2024) | - Repayment challenges and the need for multi-city implementation (Systemiq, 2021a) - Private sector investment in waste infrastructure remains limited (Systemiq, 2021a) - Waste management infrastructure is not used optimally operating under low capacity since many waste facilities being non-functioning due to lack of resources, budget and community objections (CLOCC, 2021). - Most of waste management infrastructure has been classified as *limited control* (i.e., unregistered facilities with marked boundaries, no control of environmental pollution and provisions made for occupational health and safety, not detailed weighing and recording) (CLOCC, 2021). |
| [*(5)*+*(12)+(16)*] | **NG**: The government has been issuing green bonds and green sukuks (an Islamic finance instrument) since 2018, with waste management projects among those eligible for financing offering an opportunity to incorporate plastic waste management programs and activities as underlying assets in future green sukuk issuances, thereby attracting private investment and reducing credit risk (NPAP, 2020a) | - Further evaluation is needed to determine how these instruments can serve as suitable investment vehicles that comply with Islamic financing requirements and meet investor needs in the capital markets regarding size, term, and returns (NPAP, 2020a) |
| [*(3)*+*(13)*+*(16)*] | Social related activities such as *community well-being and educational training* play a crucial role in the development of a circular economy for plastics (Nurdiana et al., 2021).  **NGO**: Prominent socio-religious organizations such as Muhammadiyah, Nasyiatul Aisyiyah, and Nahdlatul Ulama (NU), have significantly influenced cultural norms and values within society (Arnez, 2010). These organizations have initiated women empowerment program (Diwanti et al., 2019) and funded initiatives that integrate Islamic principles into the development of productive enterprises (Syafa et al., 2020); these could incorporate environmental consciousness contingent upon the agreement of religious leaders  **Example**: In Medan city in North Sumatra Province religious leaders are onvolved awareness campaigns on waste management (IGES and CCAC-MSWI, 2019); The initiative “Ngaji Sampah” (“Sermons on Waste”) seeks to reduce plastic usage and switch to reusable bags launched NU and Muhammadiyah, who have over 100 million followers (Abejon et al., 2020) | - In the list of 112 stakeholders, none currently combine activities (*16)* with *(7)* and/or *(8)* in Banyuwangi |
| [*(2)+(9)*] | **LG**: Some regencies/cities are exploring collaboration with Regional Water Supply Companies (PDAM) to allow customers to pay waste retribution fees with their utility bills or property taxes to align with global standards of fee consolidation, improving fee collection for waste management services (Systemiq, 2021a) | - Local authorities or utilities may resist the change due to concerns about additional administrative burdens - Not all households may have equal access to water services, leading to inequities in how waste management fees are applied or collected. |
| *[(6)+(10)]* | This combination involves multiple categories of stakeholders who can participate in efforts to protect ecosystem services that support livelihoods, food security, and public health. Safeguarding healthy marine and land ecosystems is essential for ensuring the economic stability of communities that rely on these resources. (Ratnawati et al., 2020, GIG, 2020, Phelan et al., 2020) | - 12-16 tn of plastic waste is leaked into the marine environment within the regency every day posing a significant environmental risk and loss of resources; residents have faced incidents of flooding due to waste dumping in rivers (CLOCC, 2021) - Different stakeholders involved in this combination may have varying interests, priorities, and goals, which can lead to conflicts, confusion, or a lack of coherent strategy in addressing ecosystem protection; without clear roles and responsibilities, it can be difficult to hold stakeholders accountable for their commitments resulting in inaction or insufficient efforts to protect ecosystems. |
| *The numbers correspond to the following activities: (1) Leadership; (2) Decision-making; (3) Community well-being; (4) Regional development; (5) Infrastructure development; (6) Environmental conservation; (7) Waste management; (8) Pollution control and reduction; (9) Water resources management; (10) Marine resource conservation; (11) Environmental health; (12) Financial management; (13) Educational training; (14) Tourism development; (15) Research & Development (R&D); (16) Religious affairs; (17) Other public services; (18) Communication; (19) Science and Innovation (S&I); (20) Plastic reprocessing; (21) Product manufacturing | | |

1. **Power and interest based on activities and stakeholder categories**

- **High power:** political >0.5
- **High interest:** environmental >0.5

**Table D1 Level of power and interest of stakeholder categories as specified by the Mendelow matrix, across different stages of value chain and spatial level based on their activities**

| Category | Number of activities | Stakeholder priorities (primary interests) based on our analysis  (bold indicates value chain and (no.stakeholders)) | High Power  High Interest | High Power  Low Interest | Low Power  High Interest | Low Power  Low Interest |
| --- | --- | --- | --- | --- | --- | --- |
| Local government (LG) | 1, 2, 3, 4, 5, 6, 7, 8, 9, 12, 14, 16, 17  1, 2, 6, 7, 11 | **P-C-M (22)**  Political (10) = 0.76  Social (9) = 0.69  Economic (6) = 0.46  Environmental (5) = 0.38  Technical (5) = 0.38  **C-M (2)**  Political (3) = 0.6  Social (3) = 0.6  Environmental (3) = 0.6  Technical (2) = 0.4  Economic (2) = 0.4 | **X** | **X** |  |  |
| National government (NG) | 1, 2, 4, 5, 6, 8, 10, 11, 12, 14, 15, 17    1, 2, 21  1, 2, 7 | **P-C-M (13)**  Political (9) = 0.75  Economic (7) = 0.67  Social (7) = 0.58  Environmental (5) = 0.42  Technical (4) = 0.33  **P-C (1)**  Political (2) = 0.67  Economic (2) = 0.67  Technical (2) = 0.67  Social (1) = 0.33  Environmental (0) = 0  **C-M (1)**  Political (3) = 1  Economic (2) = 0.67  Social (1) = 0.33  Technical (2) = 0.67  Environmental (1) = 0.33 |  | **X**  **X**  **X** |  |  |
| Intergovernmental bodies (IGB) | 2, 4, 5, 6, 7, 8, 10, 12, 15 | **P-C-M (4)**  Economic (6) = 0.67  Political (6) = 0.67  Environmental (5) = 0.56  Technical (5) = 0.56  Social (4) = 0.5 | **X** |  |  |  |
| Community-based organisations (CBO) | 1, 3, 8, 10, 13  1, 3, 9, 11, 13, 14  1, 3, 7, 13 | **P-C-M (2-National)**  Social (4) = 0.8  Environmental (3) = 0.6  Technical (2) = 0.2  Political (2) = 0.4  Economic (2) = 0.4  **P-C-M (5-local)**  Economic (2) = 0.33  Political (2) = 0.33  Social (6) = 1  Environmental (3) = 0.5  Technical (2) = 0.33  **C-M (2-National)**  Environmental (2) = 0.5  Social (3) = 0.75  Economic (2) = 0.5  Technical (2) = 0.5  Political (2) = 0.5 | **X** |  | **X**  **X** |  |
| Non-governmental organizations (NGO) | 3, 6, 10, 13, 16, 19  8, 13  3, 6, 7, 14  7, 8 | **P-C-M (9-National)**  Social (5) = 0.83  Environmental (4) = 0.67  Economic (3) = 0.5  Technical (2) = 0.33  Political (1) = 0.17  **C-M (1-National)**  Social (2) = 1  Technical (2) = 1  Environmental (1) = 0.5  Economic (1) = 0.5  Political (1) = 0.5  **P-C-M (2-Local)**  Environmental (3) = 0.75  Social (3) = 0.75  Economic (2) = 0.5  Political (2) = 0.5  Technical (1) = 0.25  **C-M (1-Local)**  Environmental (2) = 1  Technical (2) = 1  Political (2) = 1  Economic (1) = 0.5  Social (1) = 0.5 | **X**  **X**  **X** |  | **X** |  |
| Trade associations (TA) | 7, 14, 19  13, 19, 21  7, 20 | **P-C-M (2-National)**  Economic (3) = 1  Political (2) = 0.67  Technical (2) = 0.67  Social (2) = 0.67  Environmental (2) = 0.67  **P-C (6-National)**  Technical (3) = 1  Economic (3) = 1  Social (2) = 0.67  Environmental (1) = 0.33  Political (0)  **C-M (3-National)**  Political (2) = 1  Economic (2) = 1  Environmental (2) = 1  Technical (2) = 1  Social (0) | **X**  **X** |  |  | **X** |
| Research institutions (RI) | 6, 8, 13, 15, 19  13, 15, 16 19 | **P-C-M (4-International)**  Environmental (4) = 0.8  Technical (4) = 0.8  Social (4) = 0.8  Economic (3) = 0.6  Political (1) = 0.2  **P-C-M (3-National)**  Technical (3) = 0.75  Social (3) = 0.75  Economic (3) = 0.75  Environmental (2) = 0.5  Political (1) = 0.25 |  |  | **X**  **X** |  |
| Financial institutions (FI) | 4, 5, 6, 12, 15, 19  5,12, 19 | **P-C-M (5-International)**  Economic (5) = 0.83  Environmental (3) = 0.5  Social (3) = 0.5  Technical (3) = 0.5  Political (3) = 0.5  **P-C-M (1-National)**  Economic (3) = 1  Technical (2) = 0.67  Political (2) = 0.67  Environmental (1) = 0.33  Social (1) = 0.33 | **X** | **X** |  |  |
| Non-profit organizations (NPO) | 4, 6, 7, 8, 13, 18, 19, 20  19, 21  7, 8, 10  3, 4, 6, 7, 11, 13, 18, 19  7, 8, 13, 18 | **P-C-M (3-International)**  Social (6) = 0.75  Environmental (6) = 0.75  Economic (5) = 0.63  Technical (5) = 0.63  Political (5) = 0.63  **P-C (1-International)**  Technical (2) = 1  Economic (2) = 1  Environmental (1) = 0.5  Social (1) = 0.5  Political (0) = 0  **C-M (1-International)**  Environmental (3) = 1  Economic (2) = 0.67  Technical (2) = 0.67  Political (2) = 0.67  Social (1) = 0.33  **P-C-M (8-National)**  Social (7) = 0.88  Environmental (6) = 0.75  Economic (4) = 0.5  Technical (3) = 0.38  Political (3) = 0.38  **C-M (4-National)**  Environmental (3) = 0.75  Social (3) = 0.75  Technical (3) = 0.75  Political (3) = 0.75  Economic (2) = 0.5 | **X**  **X**  **X** |  | **X**  **X** |  |
| Enterprise | 7, 8, 13, 18, 20  6, 7, 8, 10, 15  8, 13, 19 | **C-M (3-National)**  Technical (4) = 0.8  Environmental (4) = 0.8  Political (4) = 0.8  Economic (3) = 0.6  Social (3) = 0.6  **P-C-M (1-International)**  Environmental (5) =1  Economic (3) = 0.6  Technical (3) = 0.6  Social (2) = 0.4  Political (2) = 0.4  **C-M (1-International)**  Technical (3) = 1  Social (3) = 1  Economic (2) = 0.67  Environmental (2) = 0.67  Political (1) = 0.33 | **X** |  | **X**  **X** |  |
| Media | 18 | **P-C-M (1-National)**  Social (1) = 1  Political (1) = 1  Environmental (1) = 1 | **X** |  |  |  |

**References**

ABEJON, R., LASO, J., MARGALLO, M., ALDACO, R., BLANCA-ALCUBILLA, G., BALA, A. & FULLANA-I-PALMER, P. 2020. Environmental impact assessment of the implementation of a Deposit-Refund System for packaging waste in Spain: A solution or an additional problem? *SCIENCE OF THE TOTAL ENVIRONMENT,* 721.

APRINDO. 2018. *INDONESIAN RETAIL MERCHANTS ASSOCIATION (APRINDO)* [Online]. Available: <https://unglobalcompact.org/what-is-gc/participants/123241-APRINDO-Indonesian-Retail-Merchants-Association> [Accessed 20 November 2024].

ARGO, T. A. & RACHMAWATI, Y. The Prospect of Implementing Circular Economy of Solid Waste in Small Islands: A Case Study of Karimunjawa Islands District, Central Java-Indonesia. IOP Conference Series: Earth and Environmental Science, 2021. IOP Publishing, 012006.

ARISMAN & FATIMAH, Y. A. 2023. Waste Management in Indonesia: Strategies and Implementation of Sustainable Development Goals (SDGs) and Circular Economy. *Circular Economy Adoption: Catalysing Decarbonisation Through Policy Instruments.* Springer.

ARNEZ, M. 2010. Empowering women through Islam: Fatayat NU between tradition and change. *Journal of Islamic Studies,* 21**,** 59-88.

ASMORO, B. T., ANWARTINNA, M. & HANDAYANI, S. 2019. Tourism awareness groups (Pokdarwis) institutional capacity development in managing coban pandawa tourist attraction. *Proceeding ICOGISS***,** 146-156.

BECERRA, V. 2021. Clean Cities, Blue Ocean Initial Solid Waste Management Assessment (ISWMA), Indonesia (p. 58). United States Agency for International Development by Tetra Tech under the Clean Cities, Blue Ocean program.

BOREALIS. 2024. *Project STOP marks further major milestones in 2023 and makes significant progress in the Project STOP Banyuwangi Hijau expansion program* [Online]. Available: <https://www.borealisgroup.com/news/project-stop-marks-further-major-milestones-in-2023-and-makes-significant-progress-in-the-project-stop-banyuwangi-hijau-expansion-program#:~:text=The%20Project%20STOP%20scale%2Dup,and%20launching%20initial%20service%20rollouts>. [Accessed 20 November 2024].

BRESNAHAN, C. O. 2020. *TOURISTS AT KAWAH IJEN CRATER* [Online]. Available: <https://borgenproject.org/tag/banyuwangi-regency/> [Accessed 3 October 2024].

CLOCC. 2021. *Integrated sustainable waste management: waste data baseline report Banyuwangi regency, Idonesia* [Online]. Available: <https://s3-eu-west-1.amazonaws.com/avfall-norge-no/dokumenter/CLOCC_Banyuwangi-Waste-Data-Baseline-Report.pdf?mtime=20220110135431&focal=none> [Accessed 3 October 2024].

DEL PILAR QUIROZ GALVAN, M., FRITZ, M. M., ŠIMUNOVIĆ, N., STERN, T. & RAUTER, R. Overcoming sustainability challenges with non-profit organisations? Insights from the apparel supply chain. Supply Chain Forum: An International Journal, 2021. Taylor & Francis, 115-135.

DIWANTI, D. P., ZAKIY, M. & ROBANI, A. 2019. THE EFFECT OF NASYIATUL AISYIYAH BUSINESS ON THE DEVELOPMENT OF ITS MEMBERS SELF-POTENTIAL: CASE STUDY IN CENTRAL JAVA. *Humanities & Social Sciences Reviews,* 7**,** 325-332.

ENVIU. 2024. *Zero Waste Living Lab by Enviu* [Online]. Available: <https://plasticdiet.id/en/zero-waste-living-lab-by-enviu/> [Accessed 3 November 2024].

ESPOSITO, B., SICA, D., MALANDRINO, O. & SUPINO, S. 2024. Social media on the route to circular economy transition from a dialogic perspective: evidence from the agri-food industry. *British Food Journal,* 126**,** 64-79.

FATHY, R. 2019. Stink and Sheen of Waste: An Effort to Empowering the Scavenger. *Global Journal of Archaeology & Anthropology,* 8.

GERASSIMIDOU, S., LOVAT, E., EBNER, N., YOU, W., GIAKOUMIS, T., MARTIN, O. V. & IACOVIDOU, E. 2022. Unpacking the complexity of the UK plastic packaging value chain: A stakeholder perspective. *Sustainable Production and Consumption,* 30**,** 657-673.

GIG. 2018. *Country Profile Indonesia* [Online]. Available: <https://www.giz.de/en/downloads/giz2018_Indonesia-Country-Profile_web.pdf> [Accessed 3 November 2024].

GIG. 2020. *Financing waste infrastructure in Indonesia* [Online]. Available: <https://www.greeninvestmentgroup.com/assets/gig/what-we-do/climate-finance-advisory/Waste-in-Indonesia_A4.pdf> [Accessed 3 October 2024].

HANNON, J. 2020. Exploring and illustrating the (inter-) disciplinarity of waste and zero waste management. *Urban Science,* 4**,** 73.

HENDERSON, L. 2023. Global perceptions of plastic pollution: The contours and limits of debate. *Cambridge Prisms: Plastics,* 1**,** e21.

IACOVIDOU, E., EBNER, N., ORSI, B. & BROWN, A. 2020. Plastic-packaging-how do we get to where we want to be? *Brunel University London, University of Leeds in collaboration with the Department for Environment, Food and Rural Affairs (DEFRA), London, UK*.

IGES. 2024. *Initiatives on climate change and environment protection in Indonesia* [Online]. Available: <https://www.iges.or.jp/sites/default/files/2024-04/Jun_Ichihara.pdf> [Accessed 20 November 2024].

IGES & CCAC-MSWI. 2019. *Work Plan for Reduction of SLCPs from Municipal Solid Waste Management MSWM in Medan City, Indonesia: 2019-2025. Institute for Global Environmental Strategies* [Online]. Available: <https://www.iges.or.jp/en/publication_documents/pub/policysubmission/en/6965/CCAC+Work+Plan_2019-2025_EN03_s.pdf> [Accessed 3 November 2024].

INDRAPRAHASTA, G., DINASEVIANI, A. & JAYANTHI, R. Smart Village and Rural Transformation: Opportunities and Challenges. Proceedings of the 2nd International Conference on Rural Socio-Economic Transformation: Agrarian, Ecology, Communication and Community Development Perspectives, RUSET 2021, 14-15 September 2021, Bogor, West Java, Indonesia, 2022.

JDIH. 2015. *BUPATI BANYUWANGI SALINAN KEPUTUSAN BUPATI BANYUWANGI NOMOR: 188/184/KEP/429.011/2015 TENTANG - FORUM KABUPATEN SEHAT DI KABUPATEN BANYUWANGI* [Online]. Available: <https://jdih.banyuwangikab.go.id/dokumen/keputusan_bupati/FORUM_KABUPATEN_SEHAT184.pdf> [Accessed 20 November 2024].

JDIH. 2020. *Regulation of the Regency of Banyuwangi no. 2 of 2020 on poverty reduction* [Online]. Available: <https://jdih.banyuwangikab.go.id/dokumen/perda_inggris/NO_2_TAHUN_2020_WARNA1.pdf> [Accessed 20 November 2024].

KRISTANTO, G. A., KEMALA, D. & NANDHITA, P. A. 2022. Challenges confronting waste pickers in Indonesia: An on-field analysis. *Waste Management & Research,* 40**,** 1381-1389.

KURNIAWAN, T. A., MEIDIANA, C., GOH, H. H., ZHANG, D., OTHMAN, M. H. D., AZIZ, F., ANOUZLA, A., SARANGI, P. K., PASARIBU, B. & ALI, I. 2024. Unlocking synergies between waste management and climate change mitigation to accelerate decarbonization through circular-economy digitalization in Indonesia. *Sustainable Production and Consumption,* 46**,** 522-542.

KURNIAWAN, T. A., MEIDIANA, C., OTHMAN, M. H. D., GOH, H. H. & CHEW, K. W. 2023. Strengthening waste recycling industry in Malang (Indonesia): Lessons from waste management in the era of Industry 4.0. *Journal of Cleaner Production,* 382**,** 135296.

LATANNA, M. D., GUNAWAN, B., FRANCO-GARCÍA, M. L. & BRESSERS, H. 2023. Governance Assessment of Community-Based Waste Reduction Program in Makassar. *Sustainability,* 15**,** 14371.

MARYANTI, D. F. 2017. *Performance of community-based solid waste management for integrated and sustainable solid waste management: The case of Bogor City, Indonesia.* UNESCO-IHE.

MAULANA, A. & WICAKSONO, I. Acceleration of Artificial Intelligence Innovation in Banyuwangi Regency Government Using an Agile Governance Approach. International Conference on Public Organization (ICONPO 2021), 2022. Atlantis Press, 520-526.

MINISTRY OF TOURIST REPUBLIC OF INDONESIA. 2020. *Indonesia Tourism Invitation* [Online]. Available: <https://investinindonesiablog.files.wordpress.com/2017/04/banyuwangi-regency.pdf> [Accessed 3 October 2024].

NPAP. 2020a. *Financing System Change to Radically Reduce Plastic Pollution in Indonesia:A Financing Roadmap Developed by the Indonesia National Plastic Action Partnership* [Online]. Available: <https://pacecircular.org/sites/default/files/2021-03/NPAP-Indonesia-Financing-Roadmap%20%281%29.pdf> [Accessed 3 October 2024].

NPAP. 2020b. *Radically Reducing Plastic Pollution in Indonesia: A Multistakeholder Action Plan* [Online]. Available: <https://pacecircular.org/sites/default/files/2021-03/NPAP-Indonesia-Multistakeholder-Action-Plan_April-2020_compressed%20%281%29.pdf> [Accessed 3 October 2024].

NPAP. 2022. *NPAP Indonesia: Policy Roadmap to Radically Reduce Plastic* [Online]. Available: <https://weforum.ent.box.com/s/nurh338urb01wj2ygrjdu7xc893fuxou> [Accessed 3 November 2024].

NURDIANA, J., FRANCO-GARCIA, M. L. & HELDEWEG, M. A. 2021. How shall we start? The importance of general indices for circular cities in Indonesia. *Sustainability,* 13**,** 11168.

OURO-SALIM, O., GUARNIERI, P. & FANHO, A. D. 2024. Unlocking value: circular economy in ngos' food waste reduction efforts in Brazil and Togo. *Discover Environment,* 2**,** 46.

PATTON, E. & LI, H. 2021. Turning the Tide: How Can Indonesia Close the Loop on Plastic Waste. *New Security Beat the blog of the environmental change and security program (wilsoncenter. org)*.

PEREIRA, G. M., BORCHARDT, M., VIEGAS, C. V., BOND, A. J., VENDRAMETTO, O. & MILAN, G. S. 2024. Facilitating most population engagement with the circular economy: Challenges for academics and (as) social media influencers. *Journal of Cleaner Production***,** 142765.

PHELAN, A. A., ROSS, H., SETIANTO, N. A., FIELDING, K. & PRADIPTA, L. 2020. Ocean plastic crisis—Mental models of plastic pollution from remote Indonesian coastal communities. *PLoS One,* 15**,** e0236149.

PIILA, N., SARJA, M., ONKILA, T. & MÄKELÄ, M. 2022. Organisational drivers and challenges in circular economy implementation: An issue life cycle approach. *Organization & Environment,* 35**,** 523-550.

PISCES. 2024. *ACTION DELIVERY PARTNERS* [Online]. Available: <https://www.piscespartnership.org/discover-pisces/our-team/> [Accessed 20 November 2024].

PRABAWATI, A., FRIMAWATY, E. & HARYANTO, J. T. 2023. Strengthening stakeholder partnership in plastics waste management based on circular economy paradigm. *Sustainability,* 15**,** 4278.

PURBA, L. A. H. & ERLIYANA, A. Legal framework of waste management in Indonesia. International Conference on Law, Governance and Islamic Society (ICOLGIS 2019), 2020. Atlantis Press, 104-108.

RATNASARI, S., MIZUNO, K., HERDIANSYAH, H. & SIMANJUTAK, E. G. 2023. Enhancing Sustainability Development for Waste Management through National–Local Policy Dynamics. *Sustainability,* 15**,** 6560.

RATNAWATI, R. V., TAHAR, N., SIDIK, U. S., ONOGAWA, K., GAMARALALAGE, P. J. D. & MAKOTO, T. 2020. National Plastic Waste Reduction Strategic Actions for Indonesia.

RIMANTHO, D., SUYITNO, B. M., PRATOMO, V. A., HARYANTO, G., PRASIDHA, I. & PUSPITA, N. 2023. Circular Economy: Barriers and Strategy to Reduce and Manage Solid Waste in the Rural Area at Jepara District, Indonesia. *International Journal of Sustainable Development & Planning,* 18.

STOP. 2024. *Waste Facility in Tembokrejo Village, built by Project STOP Muncar, receives Adipura Award as outstanding waste management initiative,* [Online]. Available: <https://www.stopoceanplastics.com/en_gb/waste-facility-in-tembokrejo-village-built-by-project-stop-muncar-receives-adipura-award-as-outstanding-waste-management-initiative/> [Accessed 3 November 2024].

SYAFA, A. K., FERAWATI EKANINGSIH, L., INAYAH, N., JAUHARIYAH, N. A. & FATHURROHMAN, A. The management of professional Zakat in overcoming the poverty in Tegalsari district regency of Banyuwangi East Java Indonesia. Proceedings of the International Conference on Industrial Engineering and Operations Management, 0 (March), 2020. 2073-2080.

SYSTEMIQ. 2021a. *Building robust waste system governance and securing stable, sufficient funding to achieve Indonesia's waste management targets* [Online]. Available: <https://www.systemiq.earth/wp-content/uploads/2021/11/Building-Robust-Waste-System-Governance-and-Securing-Sufficient-Funding_Final-Report_26Nov2021.pdf> [Accessed 3 October 2024].

SYSTEMIQ. 2021b. *Producer responsibility in Indonesia - What to know, what stakeholders think, and what could happen next* [Online]. Available: <https://www.systemiq.earth/wp-content/uploads/2022/01/Producer-Responsibility-in-Indonesia2022.pdf> [Accessed 7 November 2024].

TAUFIK, M. N. B. 2022. Communication Strategy for Empowering Kemiren Tourism Village in Efforts to Support Sustainable Development Goals. *Commercium,* 06**,** 21-33.

UN-ESCAP. 2021. *CLOSING THE LOOP ON PLASTIC POLLUTION IN SURABAYA, INDONESIA* [Online]. Available: <https://www.unescap.org/sites/default/d8files/event-documents/SB%20Baseline%20Report_English.pdf> [Accessed 3 October 2024].

UNDP. 2022. *Strengthening the implementation of a circular economy in Indonesia* [Online]. Available: <https://www.undp.org/sites/g/files/zskgke326/files/2023-07/ins-en_stakeholder_mapping_ce.pdf> [Accessed 18 November 2024].

UNEP. 2022. *Indonesia’s Draft Statement for Intergovernmental Negotiating Committee (INC)-1 on Plastic Pollution Period 2022 – 2024* [Online]. Available: <https://apps1.unep.org/resolutions/uploads/indonesia_-_statement_for_inc_plastic_pollution_-_full.pdf> [Accessed 3 November 2024].

USAID. 2022. *PLASTIC AND RECYCLING INDUSTRY OUTLOOK IN INDONESIA* [Online]. Available: <https://pdf.usaid.gov/pdf_docs/PA00ZPZ4.pdf> [Accessed 3 October 2024].

WIKURENDRA, E. A., CSONKA, A., NAGY, I. & NURIKA, G. 2024. Urbanization and Benefit of Integration Circular Economy into Waste Management in Indonesia: A Review. *Circular Economy and Sustainability***,** 1-30.

WULANDARI, H. D., PRASEHANA, A. G. & APARTA, R. D. 2020. The Challenges of Villages in the Era Of the Industrial Revolution 4.0: A Study on Policy Implementation of “Smart Kampung” in Jajag Village of Banyuwangi Regency.
